# Supplementary material for: Co-upgrading of biomass and plastic volatiles via metal-modified HZSM-5 coupled with NTP: deterioration and in situ recovery of the catalyst
Source: Royal Society of Chemistry journal article supplement (doi:10.1039/d0cy01473g), 2020-01-01
Supplement: d0cy01473g1.pdf [file d0cy01473g1.pdf]

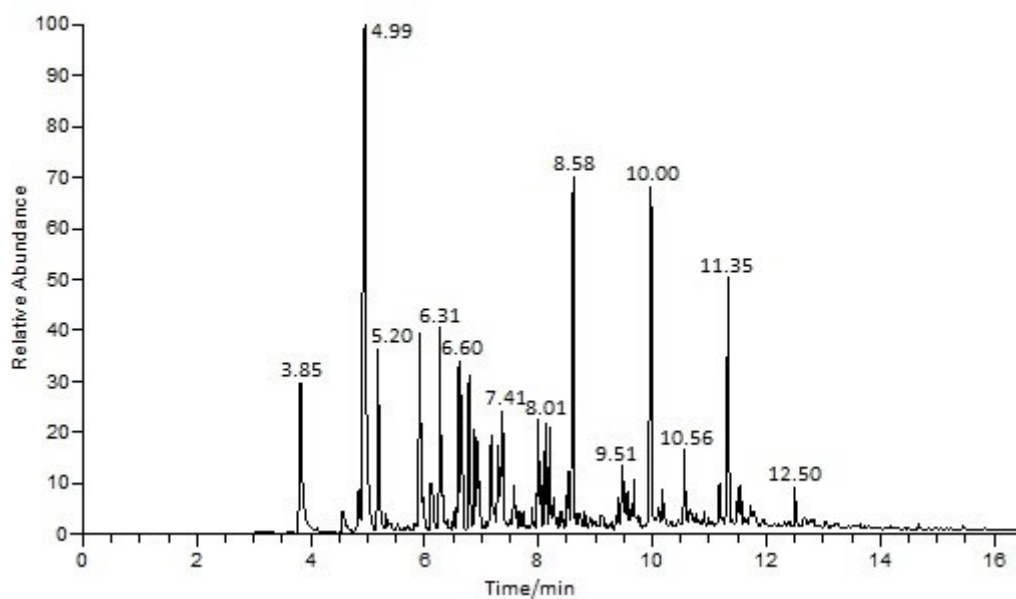

Fig.S1 The TIC spectrum of organic phase by using fresh catalyst

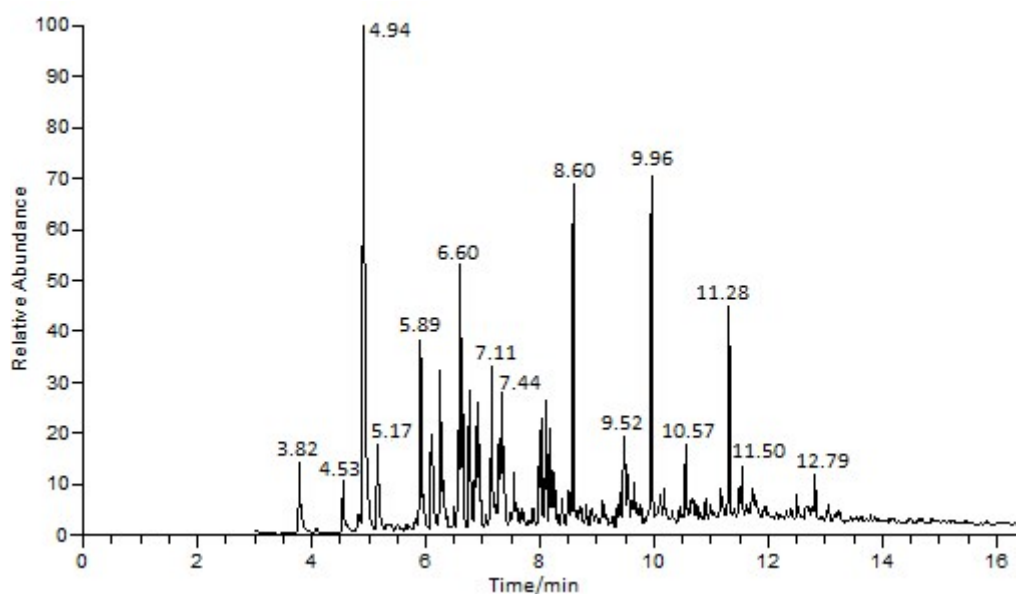

Fig.S2 The TIC spectrum of organic phase by using regenerated catalyst
